# Supplementary material for: Exciplex-forming co-host systems featuring highly twisted bis-( N -carbazolyl)benzene-based donors for high-efficiency orange OLEDs
Source: Royal Society of Chemistry journal article supplement (doi:10.1039/d4tc03393k), 2024-01-01
Supplement: d4tc03393k1.pdf [file d4tc03393k1.pdf]

## Electronic Supplementary Information

# Exciplex-forming Co-host Systems Featuring Highly Twisted Bis-(*N*-carbazolyl)benzene-based Donors for High Efficiency Orange OLEDs

Rong-Huei Yi,<sup>‡a</sup> Yi-Sheng Chen,<sup>‡b</sup> Dian Luo,<sup>b</sup> Hao Chen,<sup>a</sup> Shun-Wei Liu,<sup>bc\*</sup> Ken-Tsung Wong<sup>ad\*</sup>

<sup>a</sup> Department of Chemistry, National Taiwan University, Taipei 10617, Taiwan

<sup>b</sup> College of Engineering & Organic Electronic Research Center, Ming Chi University of Technology, New Taipei City 24031, Taiwan

<sup>c</sup> Department of Electronic Engineering, Ming Chi University of Technology, New Taipei City 24031, Taiwan.

<sup>d</sup> Institute of Atomic and Molecular Science Academia Sinica, Taipei 10617, Taiwan.

<sup>‡</sup> Rong-Huei Yi and Yi-Sheng Chen contributed equally to this work.

\* E-mail: [swliu@mail.mcut.edu.tw](mailto:swliu@mail.mcut.edu.tw) (Shun-Wei Liu); [kenwong@ntu.edu.tw](mailto:kenwong@ntu.edu.tw) (Ken-Tsung Wong)

### Experimental section

#### General information

NMR spectra were recorded on a *Varian Mercury Plus-400* (<sup>1</sup>H NMR: 400 MHz, <sup>13</sup>C NMR: 100 MHz) using deuterium substituted solvent as an internal reference.

Thermogravimetric analysis (TGA) was conducted under a nitrogen atmosphere at a heating rate of 10 °C/min on a platinum pan *via* a TA Instruments Q500 TGA (V20.13 Build 39)

As for absorption measurement, the three organic compounds were dissolved in dry toluene (10<sup>-5</sup> M), being measured with a UV-visible spectrometer (JASCO V-670 spectrophotometer). The photoluminescence (PL) spectrum was measured using a spectrofluorometer (FluoroMax-4, Horiba Jobin Yvon) with a Xenon arc lamp as the excitation light source. The excitation wavelength of PL measurement was set to 290 nm. The fluorescence spectrum of the sample was measured at room temperature, and the phosphorescence spectrum

was measured at 77 K. For the phosphorescence spectrum, the tested sample was placed in a quartz tube and placed in a Dewar with liquid nitrogen. The transient photoluminescence (TrPL) was measured by monitoring the different target wavelengths using the time-correlated single-photon counting (TCSPC) technique with a nanosecond pulsed light-emitting diode (320 nm).

The electrochemical properties of three molecules were investigated by cyclic voltammetry (CV). The oxidation potentials were carried out in anhydrous dichloromethane (DCM) solution (1.0 mM) containing 0.1 M tetrabutylammonium hexafluorophosphate ( $n\text{Bu}_4\text{NPF}_6$ ) as a supporting electrolyte with argon before conducting the experiments. A glassy carbon electrode and a platinum wire were used as the working and counter electrodes, respectively. All potentials were recorded versus Ag/AgCl as a reference electrode and calibrated with the ferrocene/ferrocenium redox couple.

Theoretical calculations with density functional theory (DFT) were performed in the gaseous state respectively at B3LYP/6-31G(d) level through Taiwan 1, built by the National Applied Research Laboratories, Taiwan.

### **OLEDs device fabrication and characterization**

For OLED fabrication, all the materials including 1,1-Bis[(di-4-tolylamino)phenyl]cyclohexane (TAPC), 4,4'-cyclohexylidenebis[*N,N*-bis(4-methylphenyl)benzenamine] (TAPC), 3',3''',3''''-(1,3,5-triazine-2,4,6-triyl)tris([1,1'-biphenyl]-3-carbonitrile) (CN-T2T), lithium fluoride (LiF), and aluminum (Al) were purchased from Shine Material Technology Co., Ltd. Before device fabrication, all the organic materials were sublimated with a homemade vacuum purification system under high vacuum conditions (*ca.*  $2 \times 10^{-6}$  torr). The Indium tin oxide (ITO) was prepared with a thickness of 70 nm on the glass substrate through the reported DC sputtering process. The glass and glass/ITO substrates follow a series of continuously cleaning processes such as using deionized (DI) water, acetone, and isopropyl alcohol in an ultrasonic bath for 10 minutes for each solution and dried with a nitrogen ( $\text{N}_2$ ) blower. The organic and metal layers were deposited by vacuum evaporation under high vacuum condition (*ca.*  $2 \times 10^{-6}$  torr). The surface profiler (Dektak XT, Bruker) and ellipsometer (SE-950, Radiation Technology Co., LTD.) utilized to ensure each material's precise thickness and refractive index before starting the device fabrication process. All the organic materials were deposited under a stable deposition rate ( $0.5 \text{ \AA s}^{-1}$ ), where the metal cathode (Al) deposition rate around  $5 \text{ \AA s}^{-1}$ . The

active area of the device was set to 4 mm<sup>2</sup>, which defined by the overlapping area of the patterned ITO anode and cathode shadow mask. After the deposition process, the device was encapsulated using encapsulation glass inside the glovebox under with oxygen and moisture concentration below 0.1 ppm. For OLED device characterization, all the electroluminescence characteristics were measured by integrated spectrometer system (LQ-100R, Enlitech) with source meter (B2901A, Keysight). The lifetime of OLED devices was measured by the multi-channel testing system (Model-58131, Chroma) under constant current mode. The capacitance-voltage (C-V) measurement were operated under 1000 Hz with electrochemical impedance spectroscopy (EIS) system (Material Lab XM series, Solartron Analytical).

## Synthesis and characterization

### Synthesis of 9-(3-(9*H*-carbazol-9-yl)phenyl)-1-phenyl-9*H*-carbazole (**Ph2Cz**)

To a two-neck round-bottom flask was added a mixture of 1-phenyl-9*H*-carbazole (**PhCz**) (1.0 g, 4.1 mmol), 9-(3-bromophenyl)carbazole (1.6 g, 5.0 mmol), cesium carbonate (Cs<sub>2</sub>CO<sub>3</sub>) (4.0 g, 12 mmol), 18-crown-6 ether (0.44 g, 1.7 mmol), copper(I) iodide (CuI) (2.4 g, 12.3 mmol) and 40 mL of dry *o*-dichlorobenzene. The system was stirred at 180 °C under argon for 36 h. After cooling to room temperature, the mixture was pass through celite and washed with DCM and then purified by column chromatography with the eluent of 1/10 = DCM/*n*-hexane to obtain the white solid **Ph2Cz** (1.3 g, 2.6 mmol, 63%). <sup>1</sup>H NMR (400 MHz, CD<sub>2</sub>Cl<sub>2</sub>) δ= 8.25 – 8.15 (m, 3H), 7.51 – 7.27 (m, 15H), 7.16 (m, 3H), 7.09 (m, 3H). HRMS (m/z, MALDI<sup>+</sup>) Calcd for C<sub>36</sub>H<sub>24</sub>N<sub>2</sub><sup>+</sup>: 484.1939, found: 484.1951; <sup>13</sup>C NMR (100 MHz, CD<sub>2</sub>Cl<sub>2</sub>) δ= 142.8, 140.9, 140.6, 139.5, 138.4, 138.2, 130.4, 123.0, 129.4, 128.0, 127.4, 127.1, 127.0, 126.7, 126.3, 126.2, 125.6, 125.4, 123.8, 120.9, 120.62, 120.59, 120.52, 120.50, 119.7, 110.5, 110.3.

### Synthesis of 1,3-bis(1-phenyl-9*H*-carbazol-9-yl)benzene (**2Ph2Cz**)

To a two-neck round-bottom flask was added a mixture of **PhCz** (1.0 g, 4.1 mmol), 1,3-diiodobenzene (0.81 g, 2.5 mmol), Cs<sub>2</sub>CO<sub>3</sub> (2.2 g, 6.2 mmol), 18-crown-6 ether (0.22 g, 0.82 mmol), CuI (1.2 g, 6.2 mmol) and 10 mL of dry *o*-dichlorobenzene. The system was stirred at 180 °C under argon for 19 h. After cooling to room temperature, the mixture was pass through celite and washed with DCM and then purified by column

chromatography with the eluent of 1/10 = DCM/*n*-hexane to obtain the white solid **2Ph2Cz** (1.0 g, 1.8 mmol, 87%). <sup>1</sup>H NMR (400 MHz, CD<sub>2</sub>Cl<sub>2</sub>) δ= 8.16 (t, *J* = 7.4 Hz, 4H), 7.48 (t, *J* = 7.7 Hz, 2H), 7.37 – 7.27 (m, 7H), 7.14 – 7.08 (m, 4H), 7.01 – 6.89 (m, 8H), 6.78 (s, 3H). HRMS (*m/z*, MALDI<sup>+</sup>) Calcd for C<sub>42</sub>H<sub>28</sub>N<sub>2</sub><sup>+</sup>: 560.2252, found: 520.2268; <sup>13</sup>C NMR (100 MHz, CD<sub>2</sub>Cl<sub>2</sub>) δ= 142.5, 139.4, 138.0, 129.5, 129.3, 128.9, 128.0, 127.0, 126.9, 126.5, 126.4, 125.8, 125.6, 123.7, 120.9, 120.6, 120.2, 119.6, 111.3.

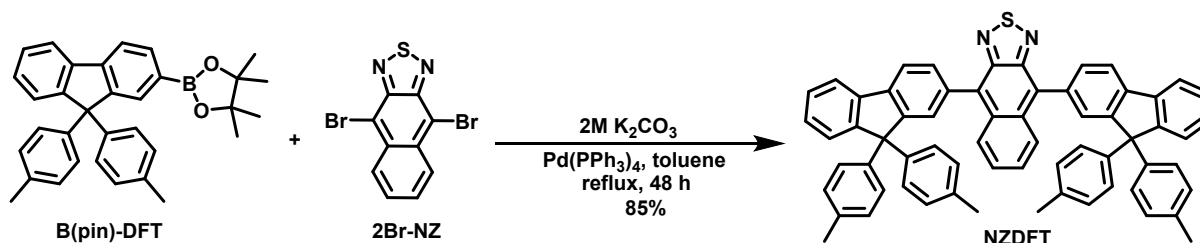

**Scheme S1.** Synthesis route of NZDFT

### Synthesis of 4,9-bis(9,9-di-*p*-tolyl-9*H*-fluorene-2-yl)naphtho[2,3-*c*][1,2,5]thiadiazole (NZDFT)

The **B(pin)-DFT** and **2Br-NZ** compound were prepared based on our previous work.<sup>1,2</sup> To a two-neck round-bottom flask was added a mixture of **B(pin)-DFT** (1.2 g, 2.5 mmol), **2Br-NZ** (0.34 g, 1.0 mmol), 2.0 M potassium carbonate (K<sub>2</sub>CO<sub>3</sub>) (0.83 g, 6.0 mmol), palladium(0)tetrakis(triphenylphosphine) (Pd(PPh<sub>3</sub>)<sub>4</sub>) (0.25 g, 0.2 mmol) and 20 mL of toluene. The system was refluxed under argon for 48 h. After cooling to room temperature, the mixture was extracted with DCM and water. Purified by column chromatography with the eluent of 1/10 = DCM/*n*-hexane to obtain the deep-red solid **NZDFT** (0.74 g, 0.85 mmol, 85%). <sup>1</sup>H NMR (400 MHz, CD<sub>2</sub>Cl<sub>2</sub>) δ= 8.01 – 7.95 (m, 4H), 7.88 (d, *J* = 7.4 Hz, 2H), 7.65 (m, 4H), 7.44 – 7.40 (m, 4H), 7.36 – 7.24 (m, 4H), 7.14 (d, *J* = 7.9 Hz, 8H), 7.03 (m, 8H), 2.24 (s, 12H). HRMS (*m/z*, MALDI<sup>+</sup>) Calcd for C<sub>64</sub>H<sub>46</sub>N<sub>2</sub>S<sup>+</sup>: 874.3376, found: 874.330; <sup>13</sup>C NMR (100 MHz, CD<sub>2</sub>Cl<sub>2</sub>) δ= 152.2, 151.9, 151.8, 143.0, 142.9, 140.4, 140.2, 136.9, 136.2, 132.2, 131.4, 130.6, 129.9, 129.3, 128.4, 128.3, 128.0, 127.4, 126.6, 126.6, 120.9, 120.4, 65.4, 21.0.

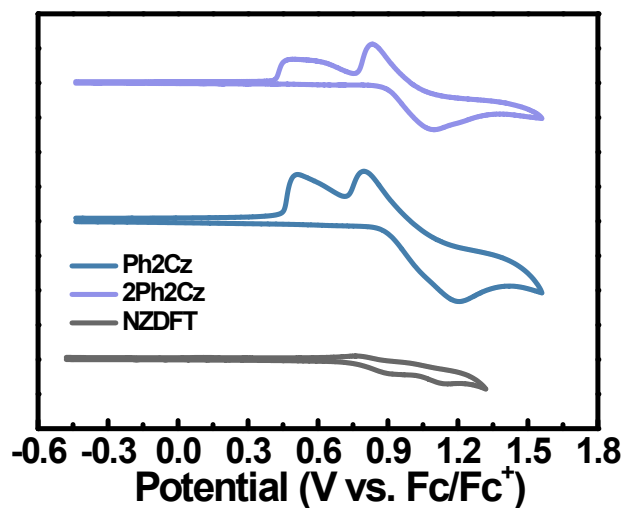

**Figure S1.** Cyclic voltammogram of Ph2Cz, 2Ph2Cz and NZDFT in DCM containing 0.1 M TBAPF<sub>6</sub> as electrolyte.

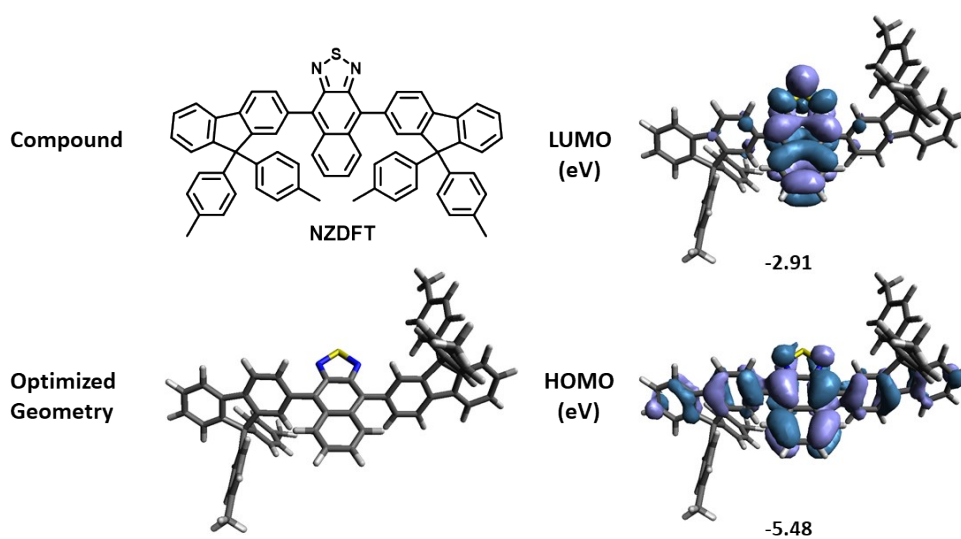

**Figure S2.** Chemical and optimized ground state structures with corresponding HOMO and LUMO orbitals of NZDFT.

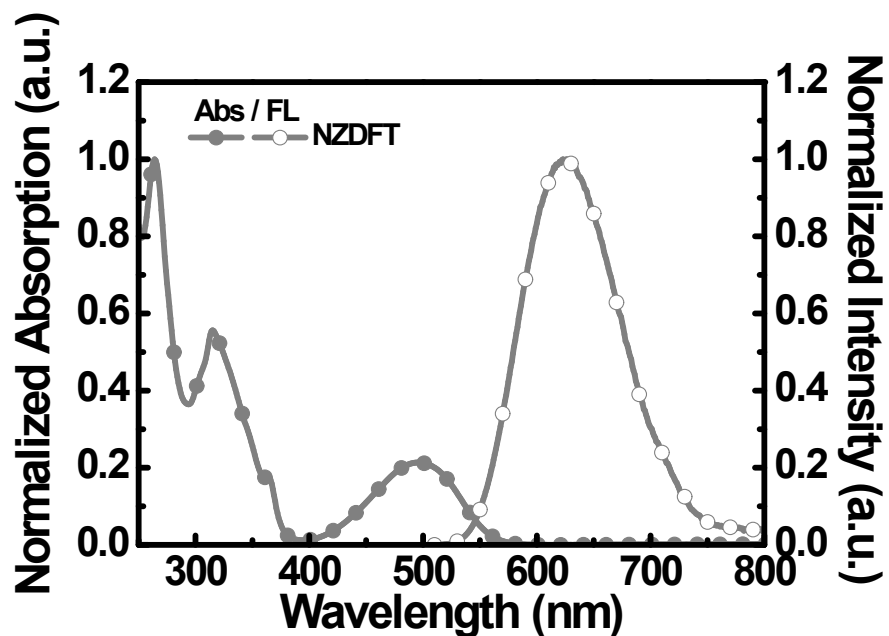

**Figure S3.** Room temperature UV-Vis absorption (Abs) and fluorescence (FL) spectra of NZDFT in toluene solution.

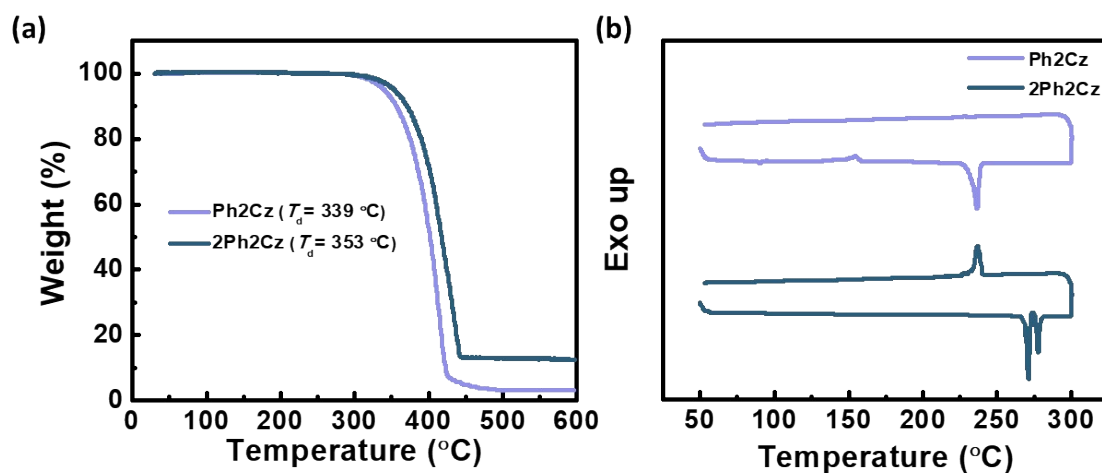

**Figure S4.** (a) Thermogravimetric analysis (TGA) and (b) differential scanning calorimetry (DSC) graphs of Ph2Cz and 2Ph2Cz.

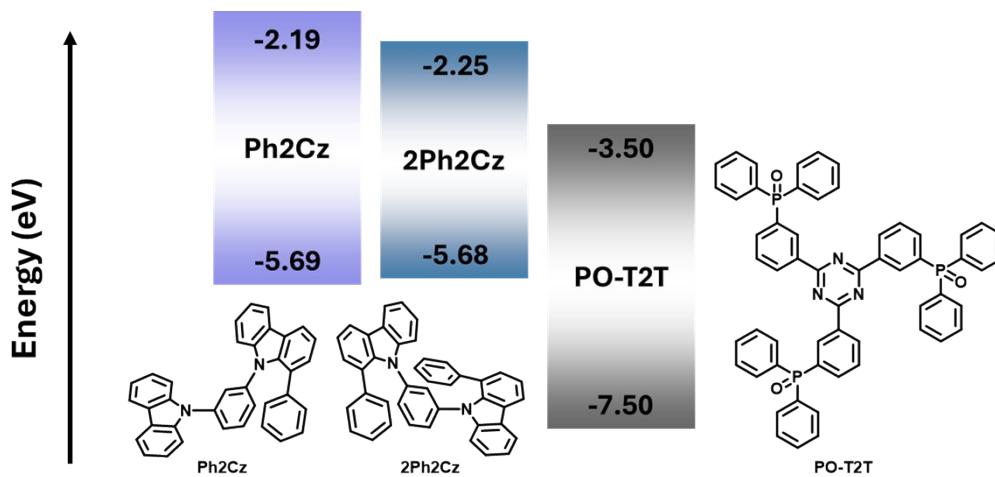

**Figure S5.** The structure and energy alignment of the donors (**Ph2Cz**, **2Ph2Cz**) and acceptor (**PO-T2T**).

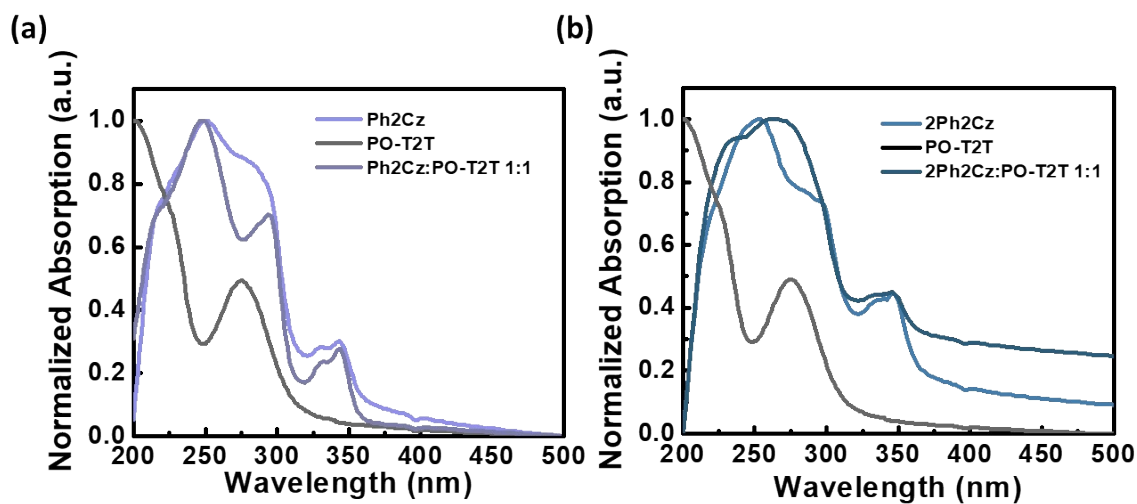

**Figure S6.** (a) Abs of **Ph2Cz**, **PO-T2T** and **Ph2Cz:PO-T2T (1:1)**; (b) Abs of **2Ph2Cz**, **PO-T2T** and **2Ph2Cz:PO-T2T (1:1)**.

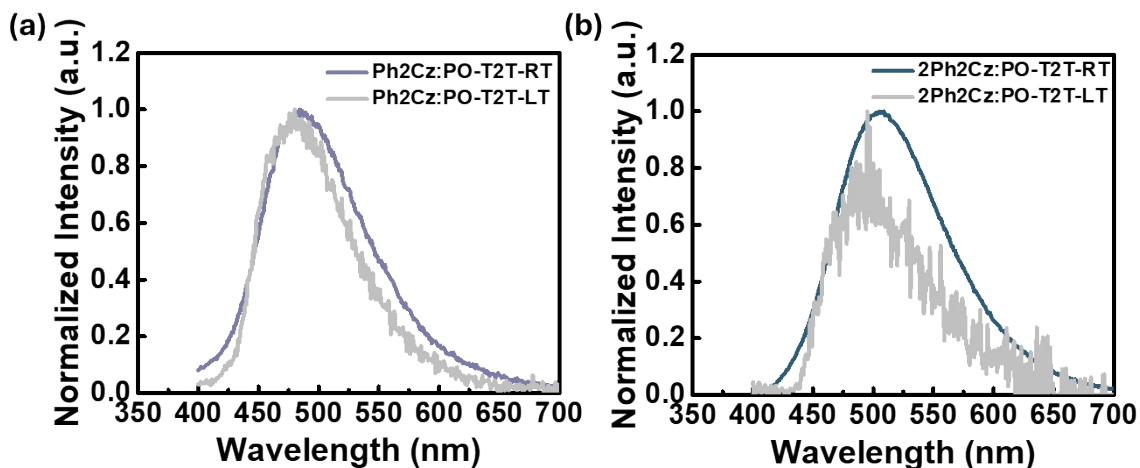

**Figure S7.** The PL spectra of (a) **Ph2Cz:PO-T2T** (1:1) (b) **2Ph2Cz:PO-T2T** (1:1) show the prompt fluorescence (delay = 0) at room temperature and delay fluorescence (delay 1 ms) at 77 K.

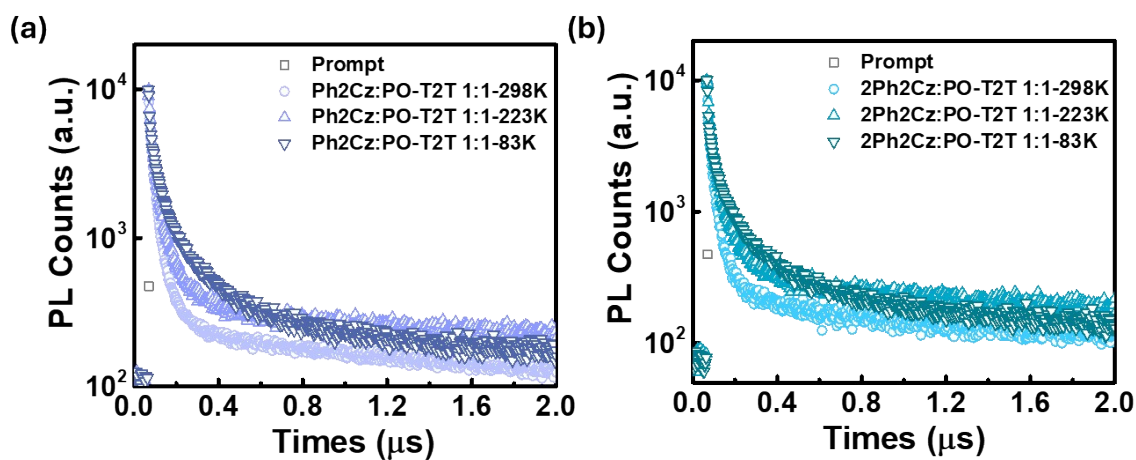

**Figure S8.** The temperature-dependent TrPL of (a) **Ph2Cz:PO-T2T** (1:1) (b) **2Ph2Cz:PO-T2T** (1:1).

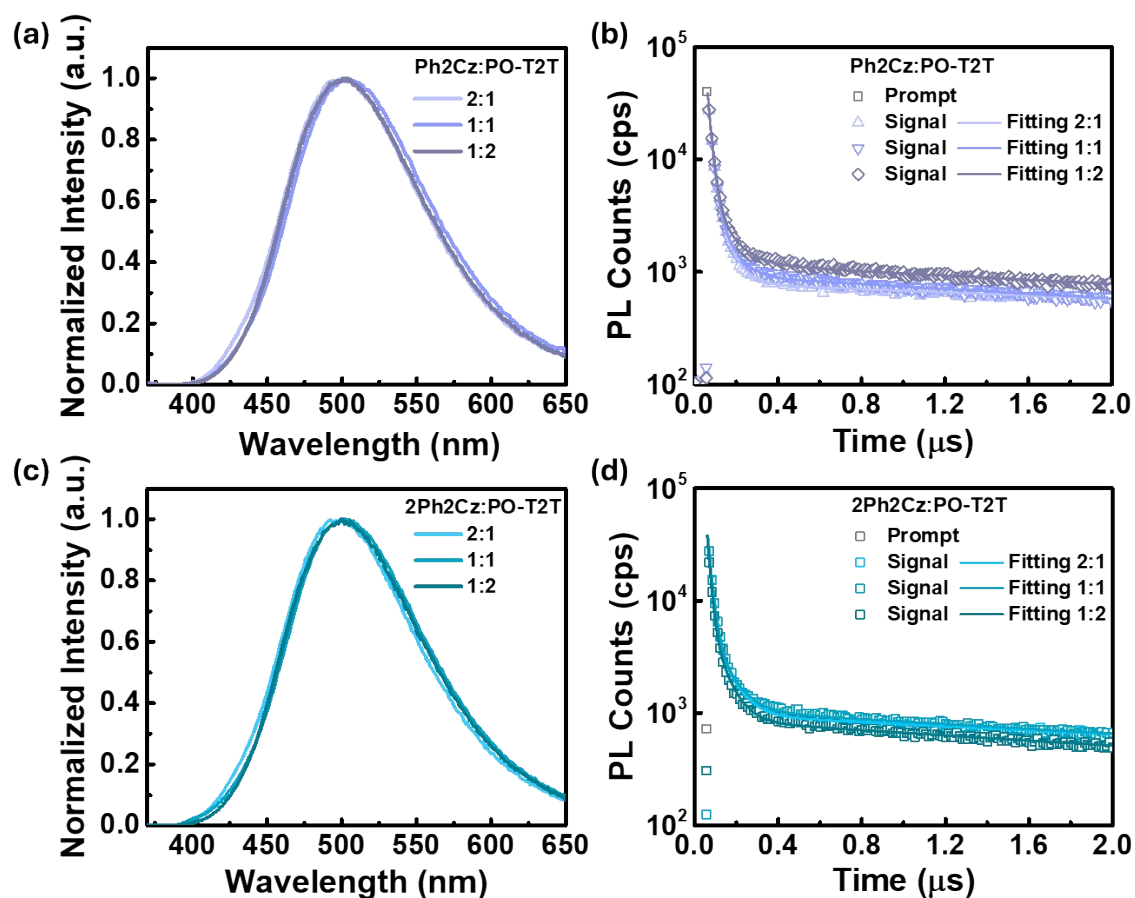

**Figure S9.** The PL spectra of (a) **Ph2Cz:PO-T2T** (2:1/1:1/1:2) and (c) **2Ph2Cz:PO-T2T** (2:1/1:1/1:2); The TrPL spectra of (b) **Ph2Cz:PO-T2T** (2:1/1:1/1:2) and (d) **2Ph2Cz:PO-T2T** (2:1/1:1/1:2).



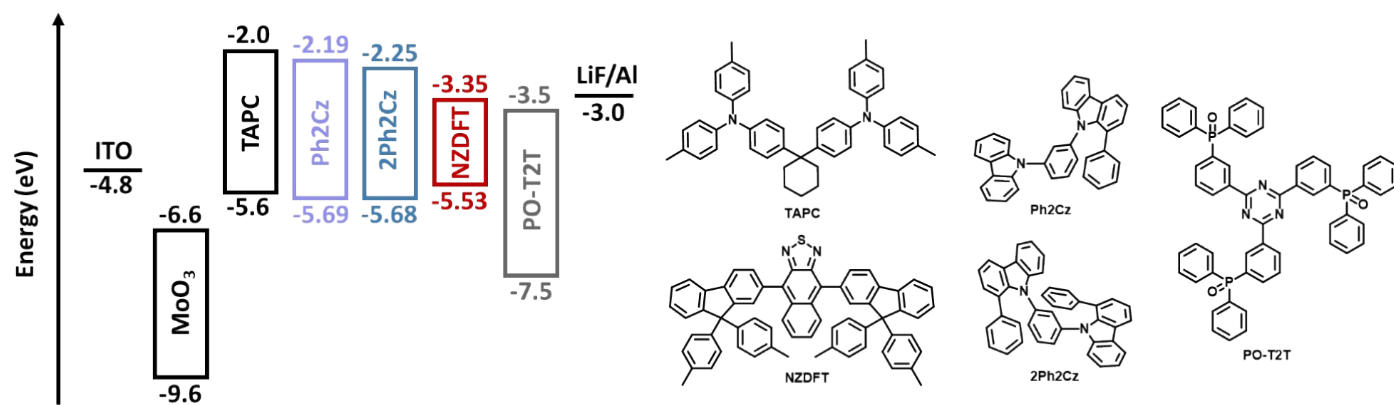

**Figure S10.** Energy level diagram of OLED device with exciplex-based EML structure and the molecular structures of the organic materials used in the device.

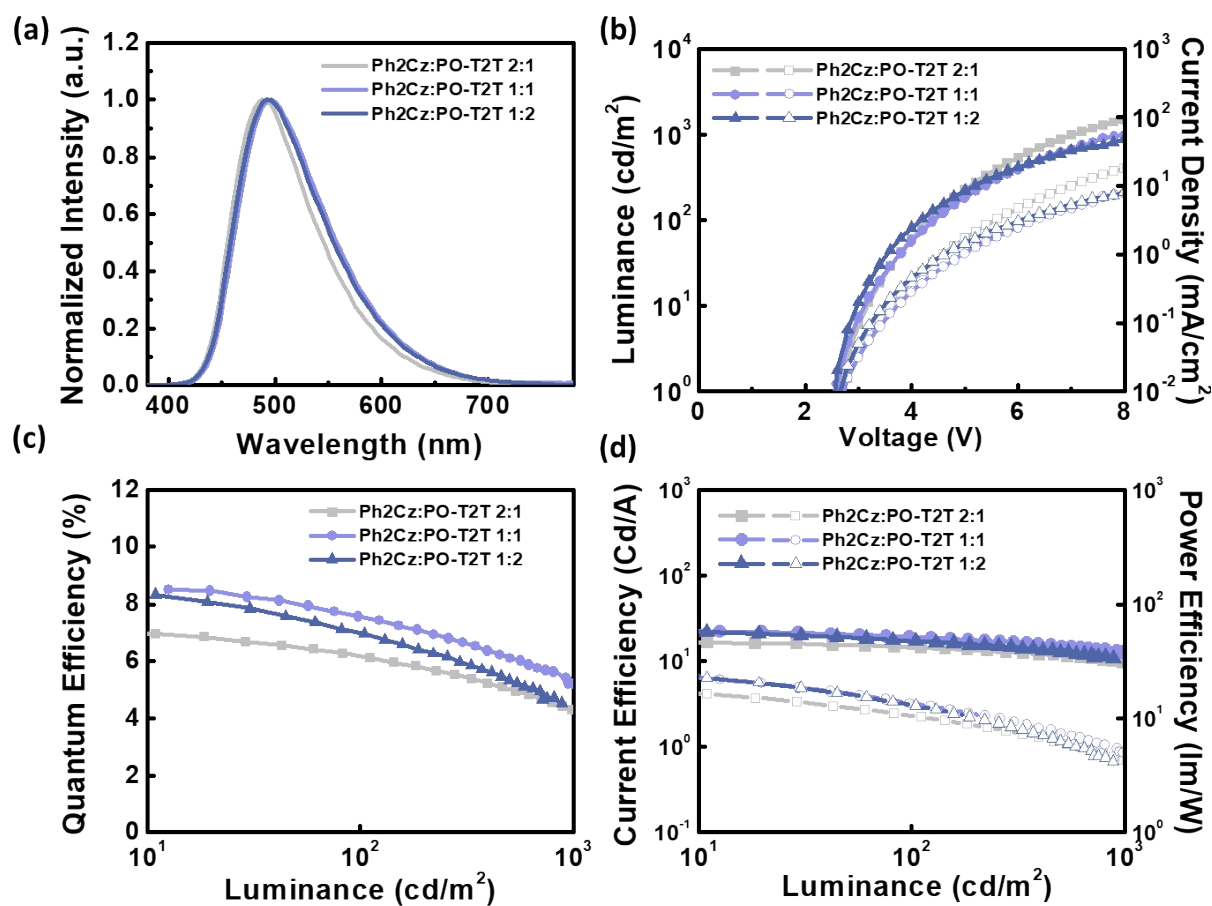

**Figure S11.** EL characteristic of different ratio for Ph2Cz:PO-T2T exciplex-OLED device.

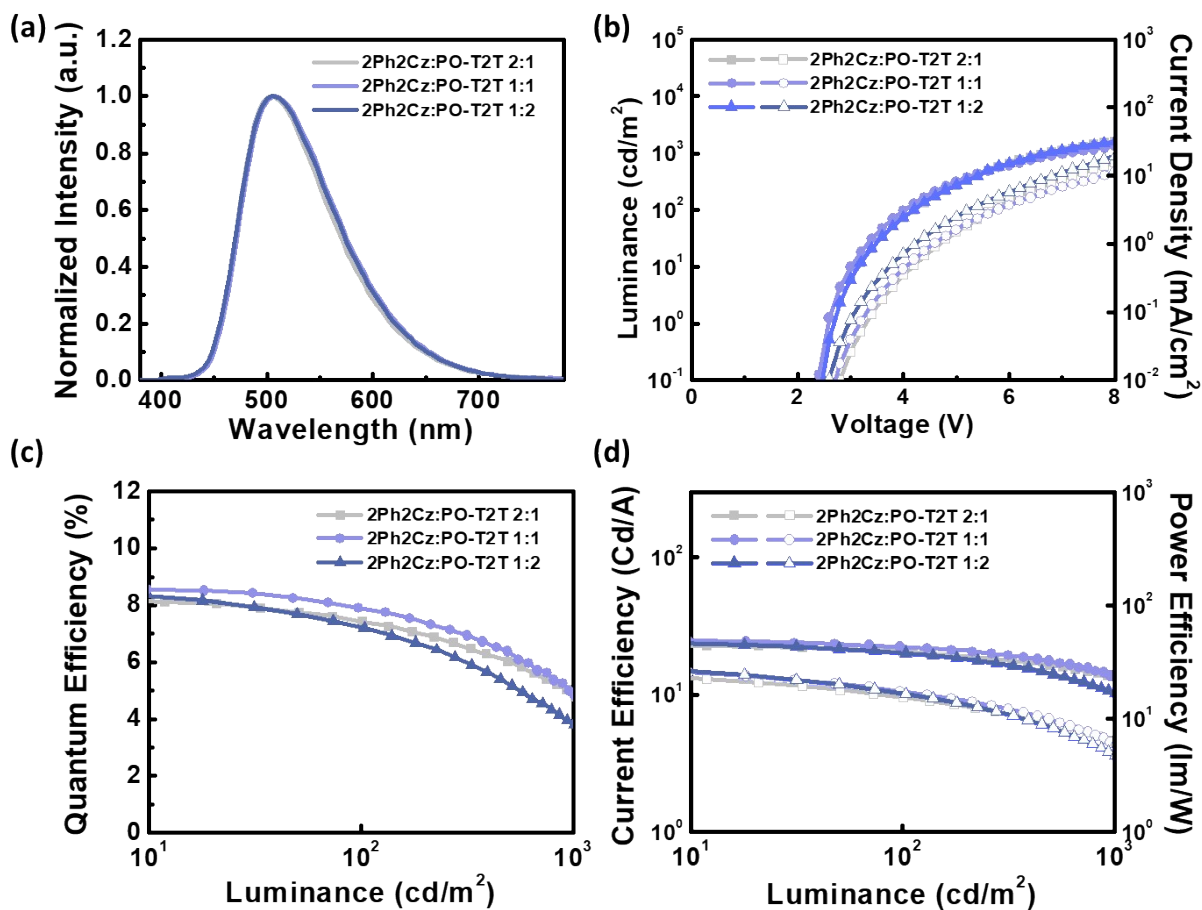

Figure S12. EL characteristic of different ratio for 2Ph2Cz:PO-T2T exciplex-OLED device.

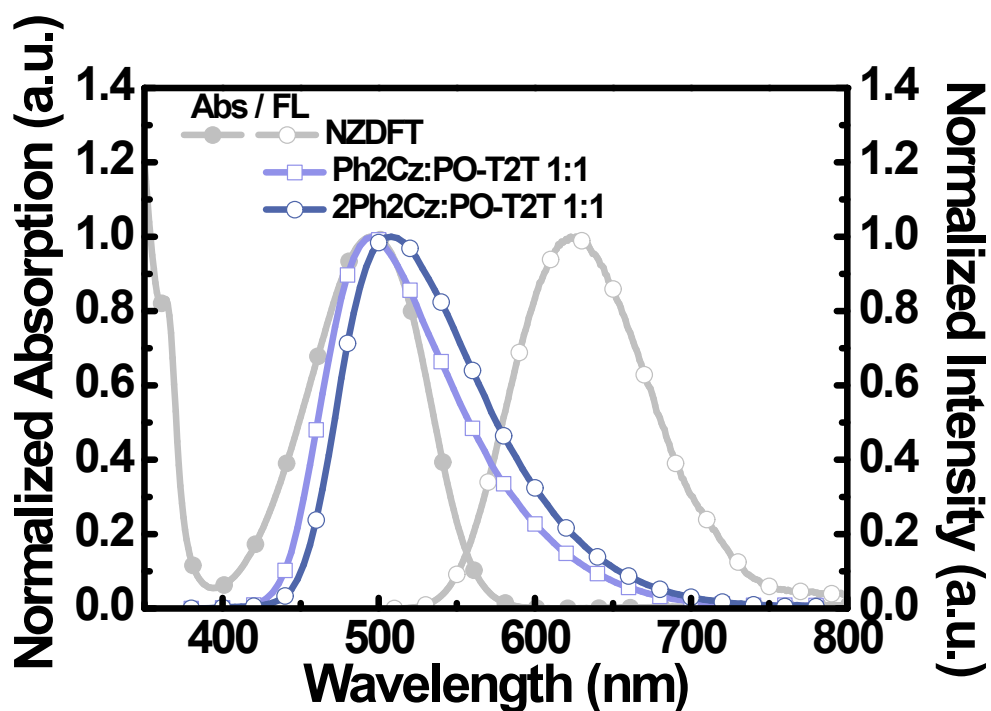

Figure S13. The overlap of UV-Vis absorption and electroluminescence spectra of NZDFT, Ph2Cz:PO-T2T (1:1) and 2Ph2Cz:PO-T2T (1:1).

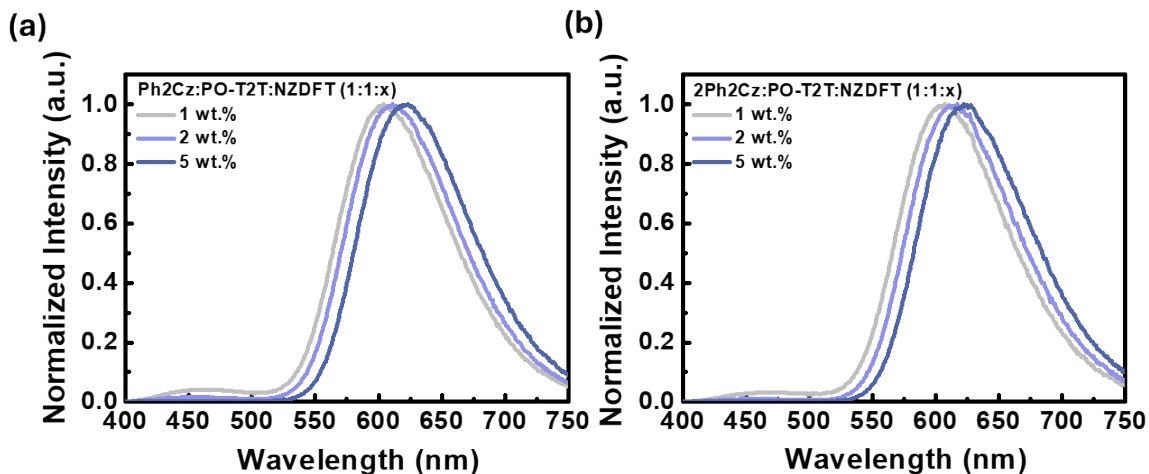

**Figure S14.** The EL spectra of 1, 2, 5 wt.% NZDFT doped in (a) Ph2Cz:PO-T2T (1:1) and (b) 2Ph2Cz:PO-T2T (1:1).

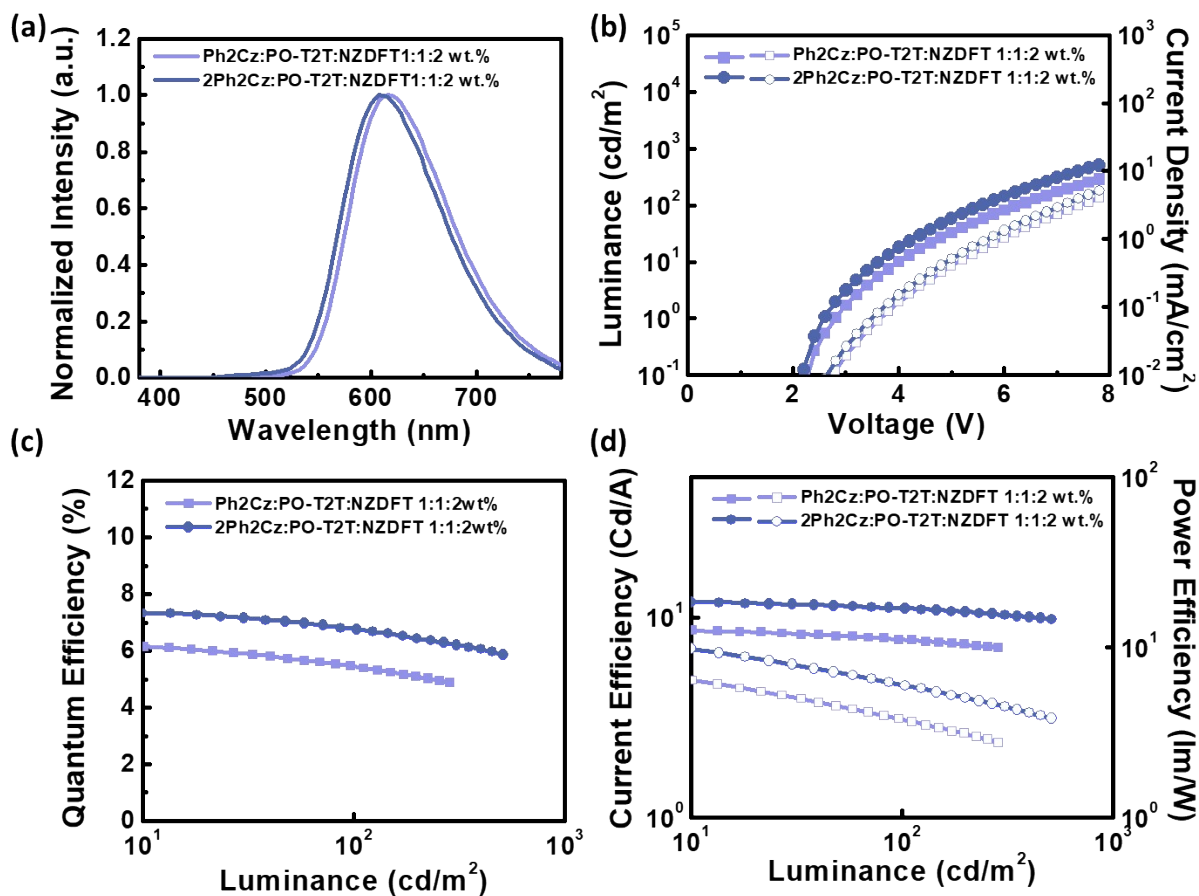

**Figure S15.** EL characteristic of 2 wt.% **NZDFT** doped into **Ph2Cz:PO-T2T 1:1** and **2Ph2Cz:PO-T2T 1:1** exciplex-OLED device.

**Table S1.** X-ray data and structure refinement parameters for **Ph2Cz** and **2Ph2Cz**.

| Crystal data                     | <b>Ph2Cz</b> (CCDC 2347701)                                                      | <b>2Ph2Cz</b> (CCDC 2347702)                                                                                  |
|----------------------------------|----------------------------------------------------------------------------------|---------------------------------------------------------------------------------------------------------------|
| Empirical formula                | C <sub>36</sub> H <sub>24</sub> N <sub>2</sub>                                   | C <sub>42</sub> H <sub>28</sub> N <sub>2</sub>                                                                |
| Formula weight                   | 484.57                                                                           | 560.66                                                                                                        |
| Crystal system                   | Orthorhombic                                                                     | Triclinic                                                                                                     |
| Space group                      | Fdd2                                                                             | P-1                                                                                                           |
| Unit cell dimensions             | a = 137.779(2) Å a = 90°<br>b = 150.791(3) Å b = 90°<br>c = 10.4737(8) Å g = 90° | a = 11.8500(4) Å a = 101.0450(12)°<br>b = 14.5179(4) Å b = 97.0994(12)°<br>c = 18.7751(6) Å g = 110.3670(11)° |
| Volume                           | 20097(2) Å <sup>3</sup>                                                          | 2907.75(16) Å <sup>3</sup>                                                                                    |
| Z                                | 32                                                                               | 4                                                                                                             |
| F(000)                           | 8128                                                                             | 1176                                                                                                          |
| Density (calculated)             | 1.281 Mg/m <sup>3</sup>                                                          | 1.281 Mg/m <sup>3</sup>                                                                                       |
| Wavelength                       | 0.71073 Å                                                                        | 1.54178 Å                                                                                                     |
| Cell parameters reflections used | 2693                                                                             | 9964                                                                                                          |
| Theta range for Cell parameters  | 3.2210 to 22.6270°                                                               | 3.36 to 78.06°                                                                                                |
| Absorption coefficient           | 0.075 mm <sup>-1</sup>                                                           | 0.570 mm <sup>-1</sup>                                                                                        |
| Temperature                      | 100(2) K                                                                         | 100(2) K                                                                                                      |
| Crystal size                     | 0.20 x 0.15 x 0.10 mm <sup>3</sup>                                               | 0.20 x 0.15 x 0.10 mm <sup>3</sup>                                                                            |
| No. of measured reflections      | 32272                                                                            | 58062                                                                                                         |
| No. of independent reflections   | 11527 [R(int) = 0.1123]                                                          | 11848 [R(int) = 0.0406]                                                                                       |
| Final R indices [I > 2σ(I)]      | R1 = 0.0877, wR2 = 0.1847                                                        | R1 = 0.0487, wR2 = 0.1273                                                                                     |
| R indices (all data)             | R1 = 0.2400, wR2 = 0.2892                                                        | R1 = 0.0525, wR2 = 0.1312                                                                                     |

**Table S2.** Summary of photophysical properties of exciplex films.

| EML                  | ratio | λ <sub>PL</sub> (nm) | PLQY (%) | Lifetime       |                     |                |                     |
|----------------------|-------|----------------------|----------|----------------|---------------------|----------------|---------------------|
|                      |       |                      |          | A <sub>1</sub> | t <sub>1</sub> (ns) | A <sub>2</sub> | t <sub>2</sub> (μs) |
| <b>Ph2Cz:PO-T2T</b>  | 2:1   | 500                  | 26       | 0.89           | 60.3                | 0.11           | 4.96                |
|                      | 1:1   | 503                  | 32       | 0.85           | 65.8                | 0.15           | 3.58                |
|                      | 1:2   | 504                  | 34       | 0.77           | 85.4                | 0.23           | 3.92                |
| <b>2Ph2Cz:PO-T2T</b> | 2:1   | 502                  | 29       | 0.86           | 77.5                | 0.14           | 4.02                |
|                      | 1:1   | 502                  | 35       | 0.83           | 81.1                | 0.17           | 3.38                |
|                      | 1:2   | 500                  | 32       | 0.88           | 66.9                | 0.12           | 3.13                |

**Table S3.** EL characteristic of different ratio for exciplex-OLED device.

| EML                      | EL <sub>max</sub> | V <sub>on</sub> <sup>a</sup> | EQE <sub>max</sub> | CE <sub>max</sub> | PE <sub>max</sub> | at 10 <sup>2</sup> nits | Luminance at 8V      |
|--------------------------|-------------------|------------------------------|--------------------|-------------------|-------------------|-------------------------|----------------------|
|                          | (nm)              | (V)                          | (%)                | (cd/A)            | (lm/W)            | (%)                     | (cd/m <sup>2</sup> ) |
| <b>Ph2Cz:PO-T2T 2:1</b>  | 484               | 3.2                          | 6.95               | 16.63             | 16.32             | 6.17                    | 1500                 |
| <b>Ph2Cz:PO-T2T 1:1</b>  | 492               | 3.2                          | 8.51               | 22.27             | 19.15             | 7.56                    | 988                  |
| <b>Ph2Cz:PO-T2T 1:2</b>  | 488               | 3.0                          | 8.34               | 21.75             | 22.78             | 6.98                    | 886                  |
| <b>2Ph2Cz:PO-T2T 2:1</b> | 500               | 3.2                          | 8.11               | 22.84             | 22.42             | 7.42                    | 1595                 |
| <b>2Ph2Cz:PO-T2T 1:1</b> | 504               | 3.2                          | 8.51               | 24.43             | 23.98             | 7.89                    | 1311                 |
| <b>2Ph2Cz:PO-T2T 1:2</b> | 500               | 3.0                          | 8.16               | 23.23             | 24.33             | 7.21                    | 1503                 |

a. Recorded at 10 cd/A.

**Table S4.** Summary of photophysical properties of fluorescent emitter with exciplex films.

| EML                                        | $\lambda_{PL}$ (nm) | PLQY (%) | Lifetime       |                     |                |                     |
|--------------------------------------------|---------------------|----------|----------------|---------------------|----------------|---------------------|
|                                            |                     |          | A <sub>1</sub> | t <sub>1</sub> (ns) | A <sub>2</sub> | t <sub>2</sub> (ns) |
| <b>Ph2Cz:PO-T2T:NZDFT</b><br>(1:1:2 wt.%)  | 610                 | 76       | 99.6           | 12.9                | 0.4            | 370.4               |
| <b>2Ph2Cz:PO-T2T:NZDFT</b><br>(1:1:2 wt.%) | 610                 | 65       | 99.7           | 12.7                | 0.3            | 347.6               |

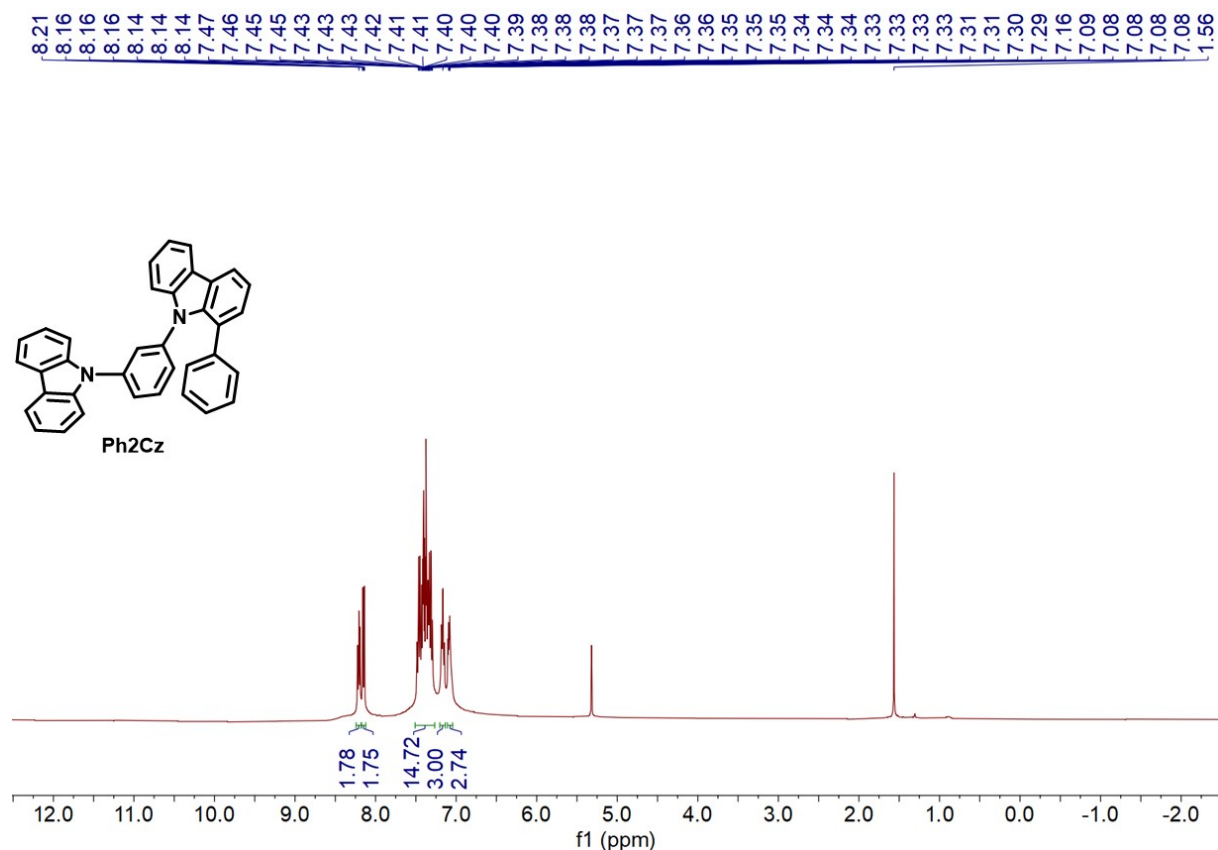

**Figure S16.** <sup>1</sup>H NMR (400 MHz, CD<sub>2</sub>Cl<sub>2</sub>) of Ph2Cz.

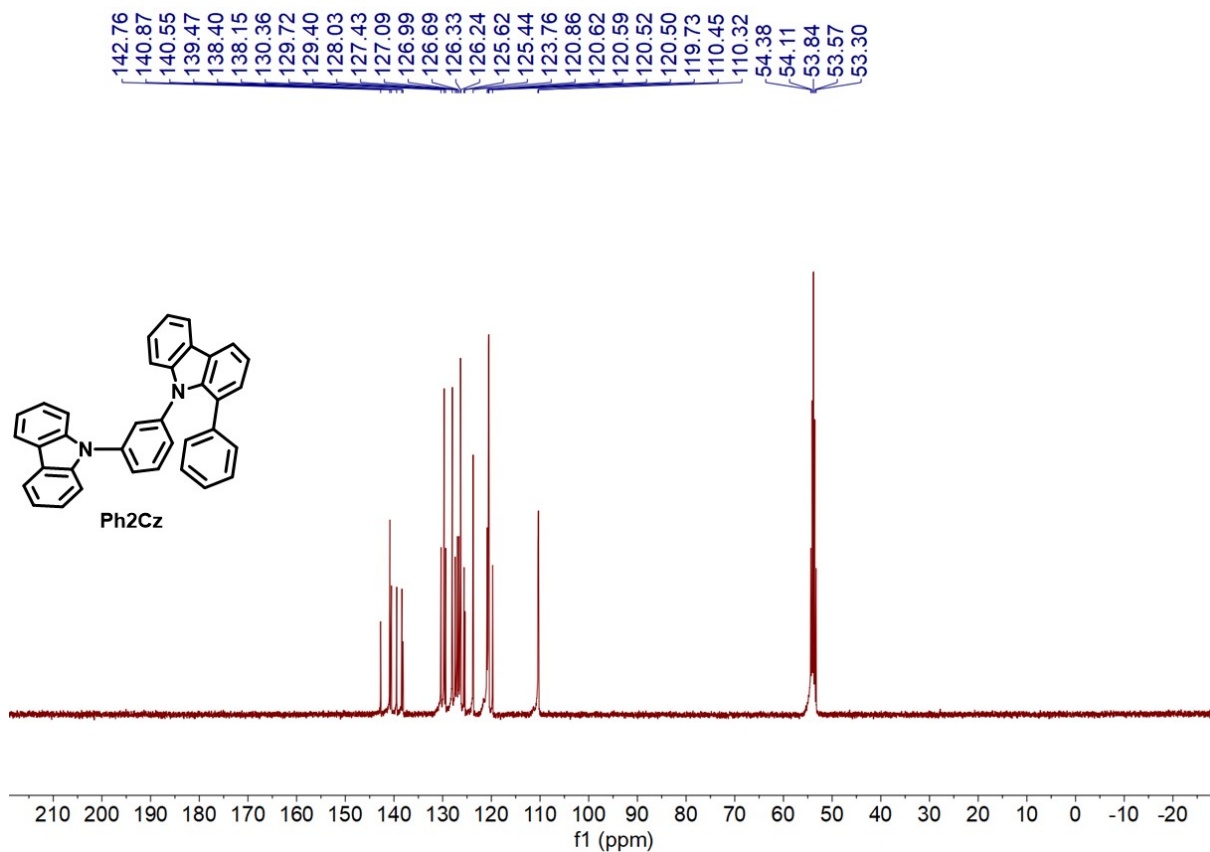

Figure S17.  $^{13}\text{C}$  NMR (100 MHz,  $\text{CD}_2\text{Cl}_2$ ) of Ph2Cz.

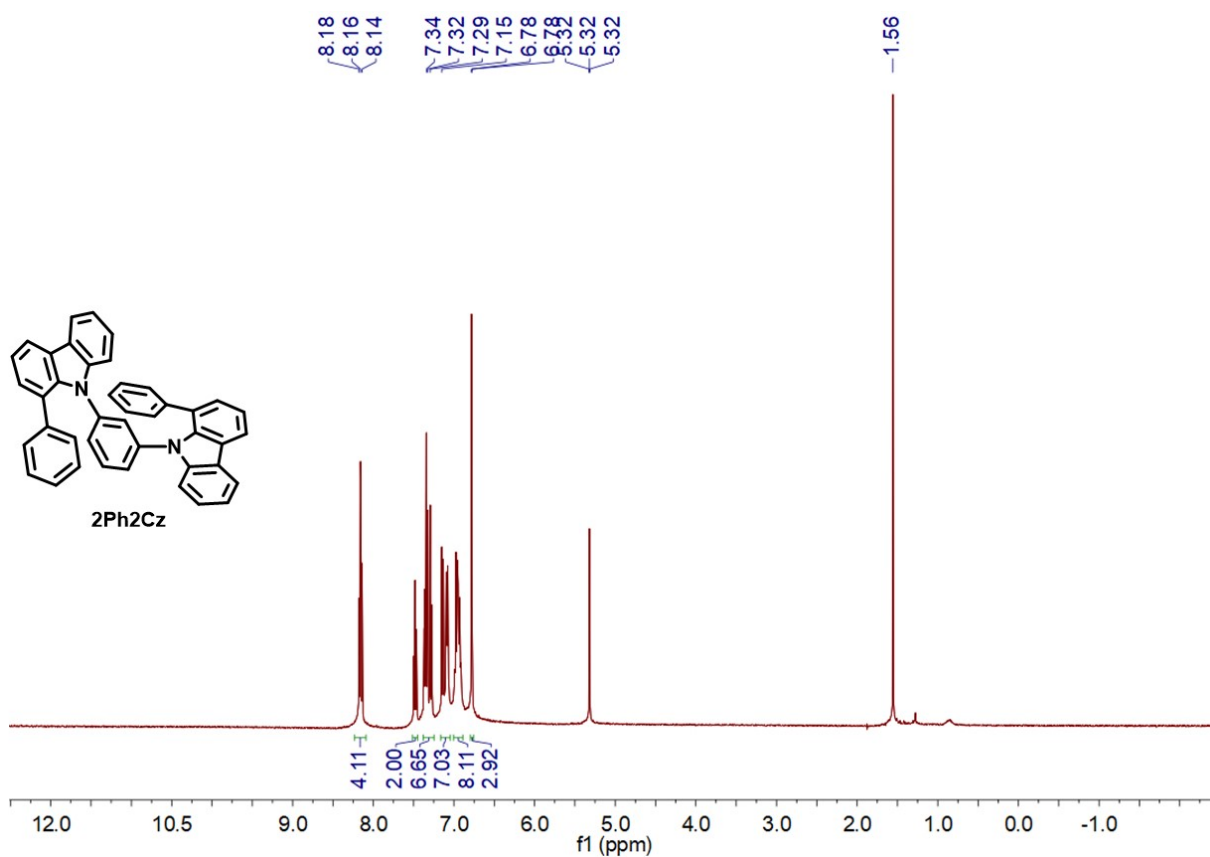

Figure S18.  $^1\text{H}$  NMR (400 MHz,  $\text{CD}_2\text{Cl}_2$ ) of 2Ph2Cz.

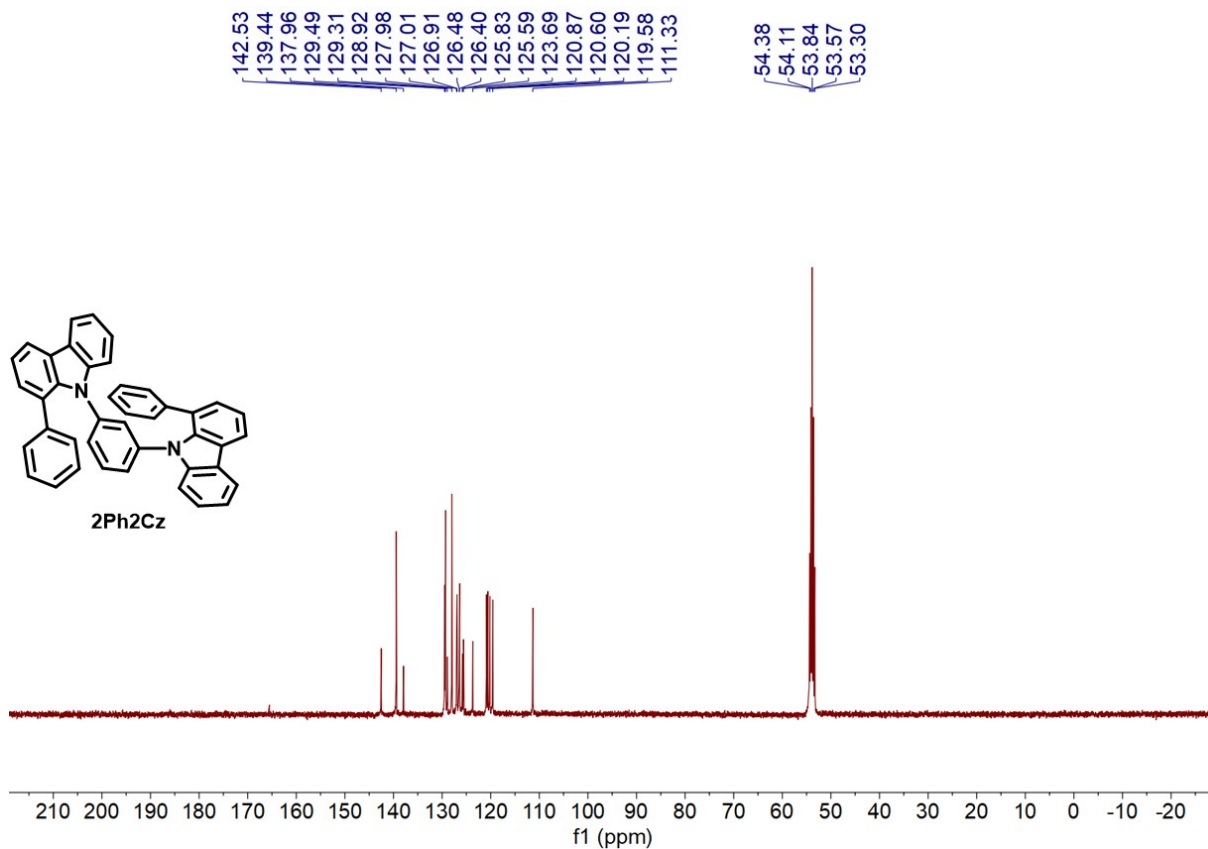

**Figure S19.** <sup>13</sup>C NMR (100 MHz, CD<sub>2</sub>Cl<sub>2</sub>) of **2Ph2Cz**.

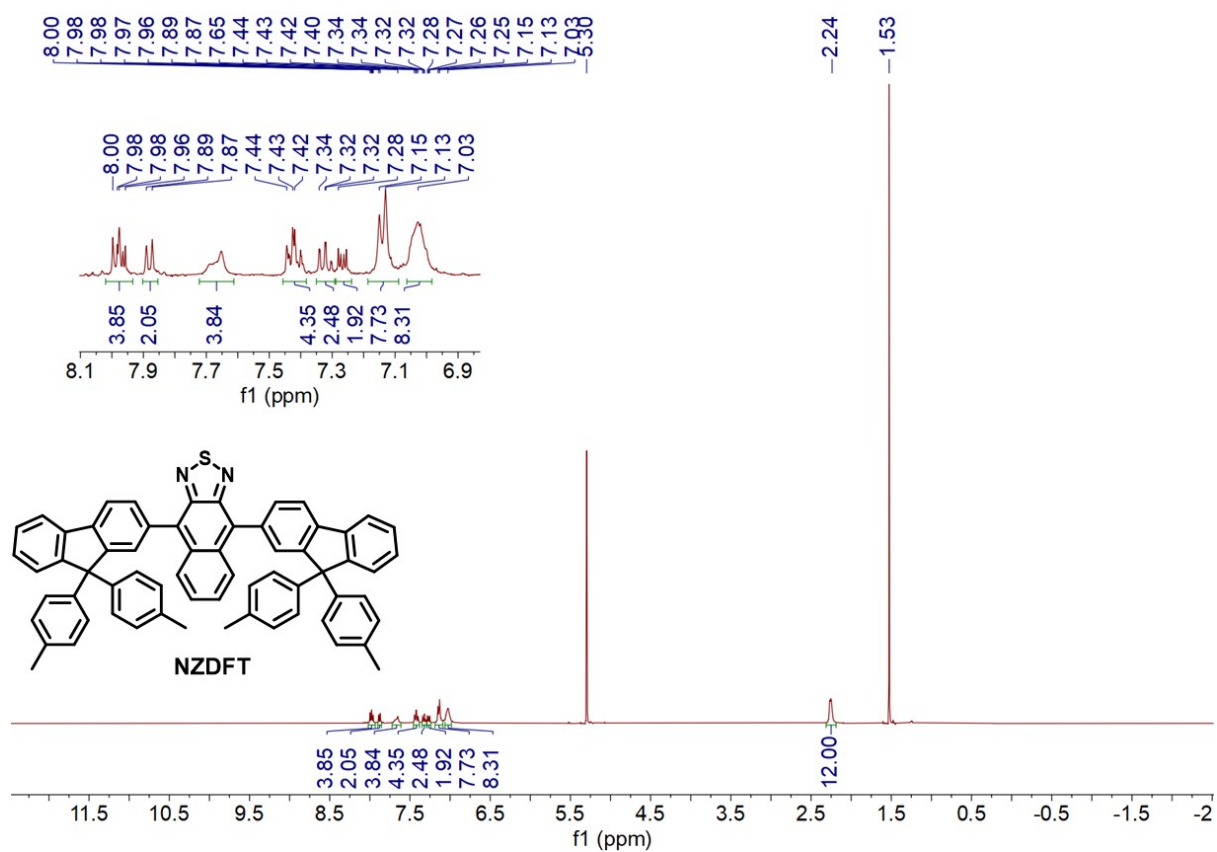

**Figure S20.**  $^1\text{H}$  NMR (400 MHz,  $\text{CD}_2\text{Cl}_2$ ) of NZDFT.

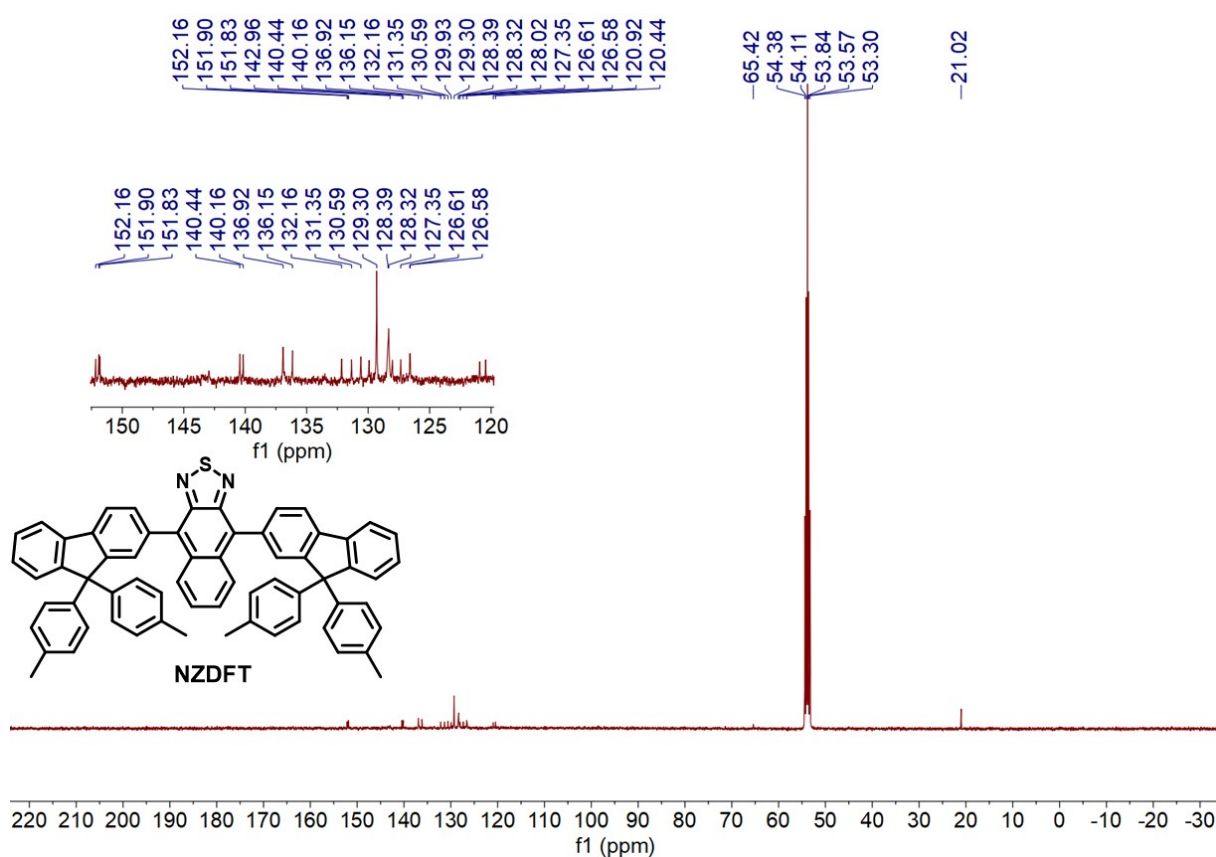

**Figure S21.**  $^{13}\text{C}$  NMR (100 MHz,  $\text{CD}_2\text{Cl}_2$ ) of NZDFT.

## Reference

1. K.-P. Tseng, F.-C. Fang, J.-J. Shyue, K.-T. Wong, G. Raffy, A. Del Guerzo and D. M. Bassani, *Angew. Chem. Inter. Edit.*, 2011, **50**, 7032-7036.
2. C.-K. Wang, X. Che, Y.-C. Lo, Y.-Z. Li, Y.-H. Wang, S. R. Forrest, S.-W. Liu and K.-T. Wong, *Chem. Asian J.*, 2020, **15**, 2520-2531.
